# Supplementary material for: The HIV-1 Tat Protein Induces the Activation of CD8+ T Cells and Affects In Vivo the Magnitude and Kinetics of Antiviral Responses
Source: PubMed Central journal article supplement (PMC3817196; doi:10.1371/journal.pone.0077746), 2013-11-04
Supplement: pone.0077746.s002.pdf [file pone.0077746.s002.pdf]

---

| Epitope Sequence | Gag aa      | Code |
|------------------|-------------|------|
| TVATLYCVHQRIEVK  | Gag 81-95   | TVA  |
| SPEVIPMFSALSEGA  | Gag 165-179 | SPE  |
| AMQMLKET         | Gag 197-205 | AMQ  |
| AAEWDRLLHPVHAGPI | Gag 209-223 | AAE  |
| IYKRWILGL        | Gag 261-270 | IYK  |
| IVRMYSPTSILDIRQ  | Gag 273-287 | IVR  |
| YKTLRAEQASQEVKN  | Gag 301-315 | YKT  |
| MTETLLVQNANPDCK  | Gag 317-331 | MTE  |

---
